# Supplementary material for: Time to health-related quality of life score deterioration as a modality of longitudinal analysis for health-related quality of life studies in oncology: do we need RECIST for quality of life to achieve standardization?
Source: Springer Nature journal article supplement (doi:10.1007/s11136-013-0583-6), 2013-11-25
Supplement: MOESM1 [file 5718774]

**Time to Health-related Quality of Life score deterioration as a modality of longitudinal analysis for health-related quality of life studies in oncology: do we need RECIST for HRQoL to achieve standardization?**

Amélie Anota<sup>1,2</sup>, Zeinab Hamidou<sup>1,3</sup>, Sophie Paget-Bailly<sup>2</sup>, Benoist Chibaudel<sup>4,5</sup>, Caroline Bascoul-Mollevi<sup>6</sup>, Pascal Auquier<sup>1,3</sup>, Virginie Westeel<sup>7</sup>, Frederic Fiteni<sup>2,8</sup>, Christophe Borg<sup>8</sup>, Franck Bonnetain<sup>1,2,5</sup>

<sup>1</sup> Quality of Life in oncology clinical research Platform, France

<sup>2</sup> Methodological and Quality of Life in Oncology Unit, EA 3181, University Hospital of Besançon, France

<sup>3</sup> Public health laboratory, EA 3279, Aix-Marseille University, Marseille, France

<sup>4</sup> Medical Oncology Department, CHU Saint-Antoine, Paris, France

<sup>5</sup> Gercor, Clinical Research Group in Oncology

<sup>6</sup> Department of Biostatistics, Regional Cancer Institute, Montpellier, France

<sup>7</sup> Pneumology Department, University Hospital of Besançon, France

<sup>8</sup> Medical Oncology Department, University Hospital of Besançon, France

Corresponding author:

Amélie Anota

Methodological and Quality of Life in Oncology Unit (EA 3181)

University Hospital of Besançon

France

Email: [aanota@chu-besancon.fr](mailto:aanota@chu-besancon.fr)

Telephone number: +33381218896

Fax number: +33381665299

Additional descriptive results obtained on the breast cancer and pancreatic cancer studies

**Table A: Baseline characteristics of patients included in breast cancer study (study #1)**

|                                      | <b>N</b> | <b>%</b> |
|--------------------------------------|----------|----------|
| <b>Hospital</b>                      |          |          |
| Dijon                                | 271      | 71.2     |
| Nancy                                | 74       | 19.4     |
| Reims                                | 18       | 4.7      |
| Strasbourg                           | 18       | 4.7      |
| <b>Marital status</b>                |          |          |
| married                              | 281      | 73.8     |
| not married                          | 90       | 23.6     |
| unknown                              | 10       | 2.6      |
| <b>Inclusion criteria</b>            |          |          |
| confirmed primitive breast cancer    | 242      | 63.5     |
| suspicion of primitive breast cancer | 138      | 36.2     |
| unknown                              | 1        | 0.3      |
| <b>Cancer</b>                        |          |          |
| confirmed                            | 340      | 89.2     |
| not confirmed                        | 38       | 10.0     |
| unknown                              | 3        | 0.8      |
| <b>Lymph node dissection(LND)</b>    |          |          |
| Axillary LND (ALND)                  | 138      | 36.2     |
| Sentinel lymph node biopsy (SLNB)    | 131      | 34.4     |
| ALND+SLNB                            | 32       | 8.4      |
| No LND                               | 75       | 19.7     |
| unknown                              | 5        | 1.3      |
| <b>Surgery type</b>                  |          |          |
| mastectomy                           | 124      | 32.6     |
| no mastectomy                        | 241      | 63.3     |
| unknown                              | 16       | 4.1      |
| <b>Chemotherapy</b>                  |          |          |
| yes                                  | 155      | 40.7     |
| no                                   | 218      | 57.2     |
| unknown                              | 8        | 2.1      |
| <b>Radiotherapy</b>                  |          |          |
| yes                                  | 254      | 66.7     |
| no                                   | 119      | 31.2     |
| unknown                              | 8        | 2.1      |
| <b>Hormone therapy</b>               |          |          |
| yes                                  | 170      | 44.6     |
| no                                   | 203      | 53.3     |
| unknown                              | 8        | 2.1      |

**Table B : Baseline characteristics of patients included in the pancreatic cancer phase II study according to treatment arm (study #2)**

|                                   | Arm 1 FOLFIRI.3 +<br>gemcitabine (N=49) |        | Arm 2 gemcitabine<br>alone (N=49) |       | All patients (N=98) |       |
|-----------------------------------|-----------------------------------------|--------|-----------------------------------|-------|---------------------|-------|
|                                   | N                                       | %      | N                                 | %     | N                   | %     |
| <b>Sex</b>                        |                                         |        |                                   |       |                     |       |
| male                              | 31                                      | 63.27  | 28                                | 57.14 | 59                  | 60.20 |
| female                            | 18                                      | 36.73  | 21                                | 42.86 | 39                  | 39.80 |
| <b>WHO performance status</b>     |                                         |        |                                   |       |                     |       |
| 0                                 | 16                                      | 32.65  | 16                                | 32.65 | 32                  | 32.65 |
| 1                                 | 33                                      | 67.35  | 33                                | 67.35 | 66                  | 67.35 |
| <b>Previous surgery</b>           |                                         |        |                                   |       |                     |       |
| no                                | 38                                      | 77.55  | 40                                | 81.63 | 78                  | 79.59 |
| yes                               | 11                                      | 22.45  | 9                                 | 18.37 | 20                  | 20.41 |
| <b>Surgery type</b>               |                                         |        |                                   |       |                     |       |
| curative                          | 5                                       | 10.20  | 4                                 | 8.16  | 9                   | 9.18  |
| palliative                        | 5                                       | 10.20  | 5                                 | 10.20 | 10                  | 10.20 |
| not applicable                    | 38                                      | 77.55  | 40                                | 81.63 | 78                  | 79.59 |
| missing                           | 1                                       | 2.04   | 0                                 | 0.00  | 1                   | 1.02  |
| <b>Number of metastatic sites</b> |                                         |        |                                   |       |                     |       |
| 1                                 | 33                                      | 67.35  | 35                                | 71.43 | 68                  | 69.39 |
| More than 1                       | 16                                      | 32.65  | 14                                | 28.57 | 30                  | 30.61 |
| <b>Previous chemotherapy</b>      |                                         |        |                                   |       |                     |       |
| no                                | 44                                      | 89.8   | 40                                | 81.63 | 84                  | 85.71 |
| yes                               | 2                                       | 4.08   | 3                                 | 6.12  | 5                   | 5.10  |
| missing                           | 3                                       | 6.12   | 6                                 | 12.24 | 9                   | 9.18  |
| <b>Primary tumor location</b>     |                                         |        |                                   |       |                     |       |
| head                              | 18                                      | 36.70  | 29                                | 59.20 | 47                  | 48.00 |
| body                              | 17                                      | 34.70  | 11                                | 22.50 | 28                  | 28.60 |
| tail                              | 17                                      | 34.70  | 12                                | 24.50 | 29                  | 29.60 |
| <b>Sites of metastasis</b>        |                                         |        |                                   |       |                     |       |
| liver                             | 39                                      | 79.60  | 35                                | 71.40 | 74                  | 75.50 |
| lung                              | 11                                      | 22.50  | 11                                | 22.50 | 22                  | 22.50 |
| Lymph node                        | 5                                       | 10.20  | 7                                 | 14.30 | 12                  | 12.20 |
| peritoneal                        | 16                                      | 33.700 | 10                                | 20.40 | 26                  | 26.50 |
| other                             | 3                                       | 6.10   | 2                                 | 4.00  | 5                   | 5.10  |

**Table C: Completion of HRQoL questionnaire at each measurement time by treatment arm for pancreatic cancer study (study #2).**

| HRQoL assessment | Arm 2 gemcitabine alone<br>N (%) <sup>1</sup> | Arm 1 FOLFIRI.3 + gemcitabine<br>N (%) | All patients<br>N (%) |
|------------------|-----------------------------------------------|----------------------------------------|-----------------------|
| <b>baseline</b>  | 30/49 (61.2)                                  | 34/49 (69.4)                           | 64/98 (65.3)          |
| <b>cycle 1</b>   | 9/21 (42.9)                                   | 17/43 (39.5)                           | 33/83 (39.8)          |
| <b>cycle 2</b>   | 2/12 (16.7)                                   | 14/32 (43.8)                           | 23/53 (43.4)          |
| <b>cycle 3</b>   | 1/4 (25.0)                                    | 9/25 (36.0)                            | 10/37 (27.0)          |
| <b>cycle 4</b>   | 1/4 (25.0)                                    | 4/16 (25.0)                            | 5/20 (25.0)           |
| <b>cycle 5</b>   | 0/2 (0.0)                                     | 3/12 (25.0)                            | 4/15 (26.7)           |
| <b>cycle 6</b>   | 0/2 (0.0)                                     | 2/11 (18.9)                            | 2/9 (22.2)            |
| <b>cycle 7</b>   | 0/1 (0.0)                                     | 1/10 (10.0)                            | 1/7 (14.3)            |
| <b>cycle 8</b>   | 0/1 (0.0)                                     | 1/10 (10.0)                            | 1/6 (16.7)            |
| <b>cycle 9</b>   | 0/1 (0.0)                                     | 1/9 (11.1)                             | 1/6 (16.7)            |
| <b>cycle 10</b>  | 0/0                                           | 1/9 (11.1)                             | 1/4 (25.0)            |

<sup>1</sup> The percentage is given according to potentially responsive patients (excluding death and drop-out)
